# Supplementary material for: Enhanced tumor-targeted gene delivery by bioreducible polyethylenimine tethering EGFR divalent ligands
Source: Royal Society of Chemistry journal article supplement (doi:10.1039/c5bm00004a), 2015-01-01
Supplement: c5bm00004a1.pdf [file c5bm00004a1.pdf]

## Supporting Information

### Enhanced tumor-targeted gene delivery by bioreducible polyethylenimine tethering EGFR divalent ligands.

Duhwan Lee<sup>a,†</sup>, Yeong Mi Lee<sup>a,†</sup>, Jihoon Kim<sup>a</sup>, Myung Kyu Lee<sup>b</sup> and Won Jong

Kim<sup>a,\*</sup>

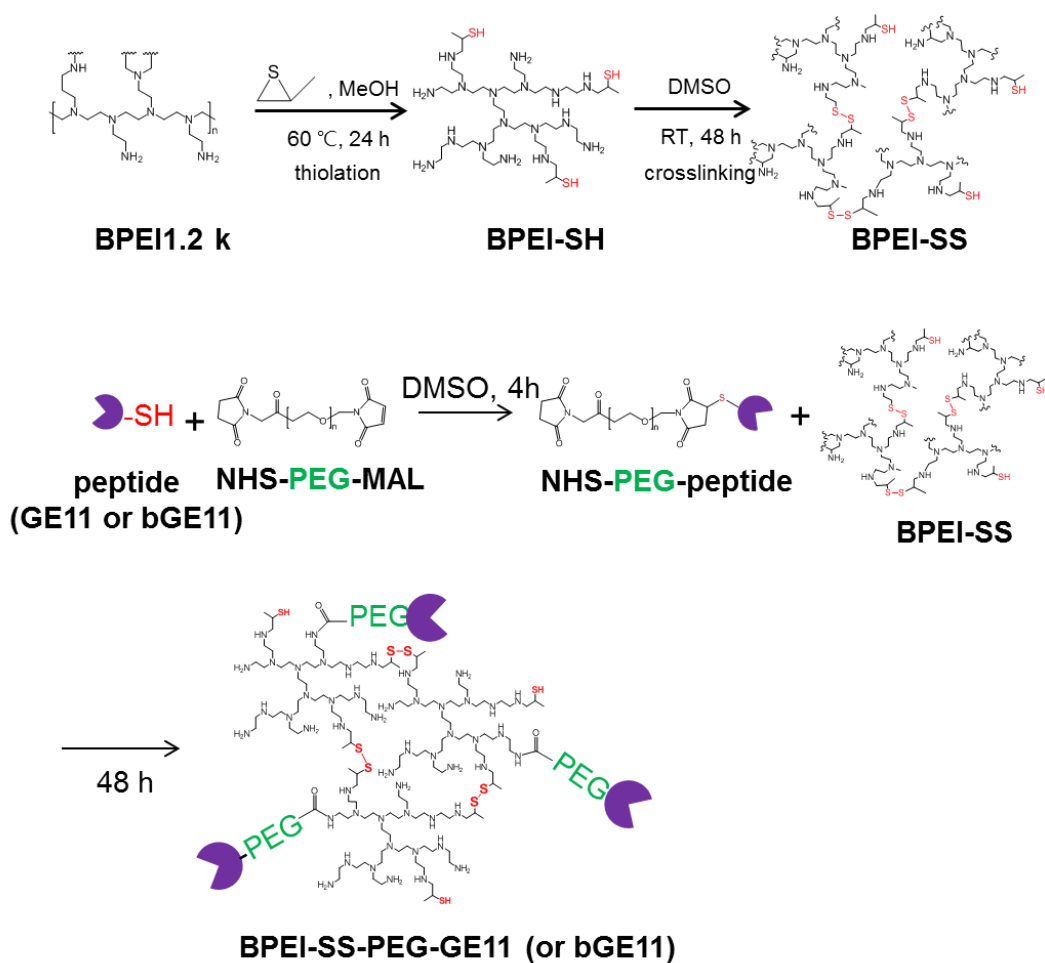

**Figure S1.** Synthetic scheme of BPEI-SS-PEG-GE11 or BPEI-SS-PEG-bGE11.

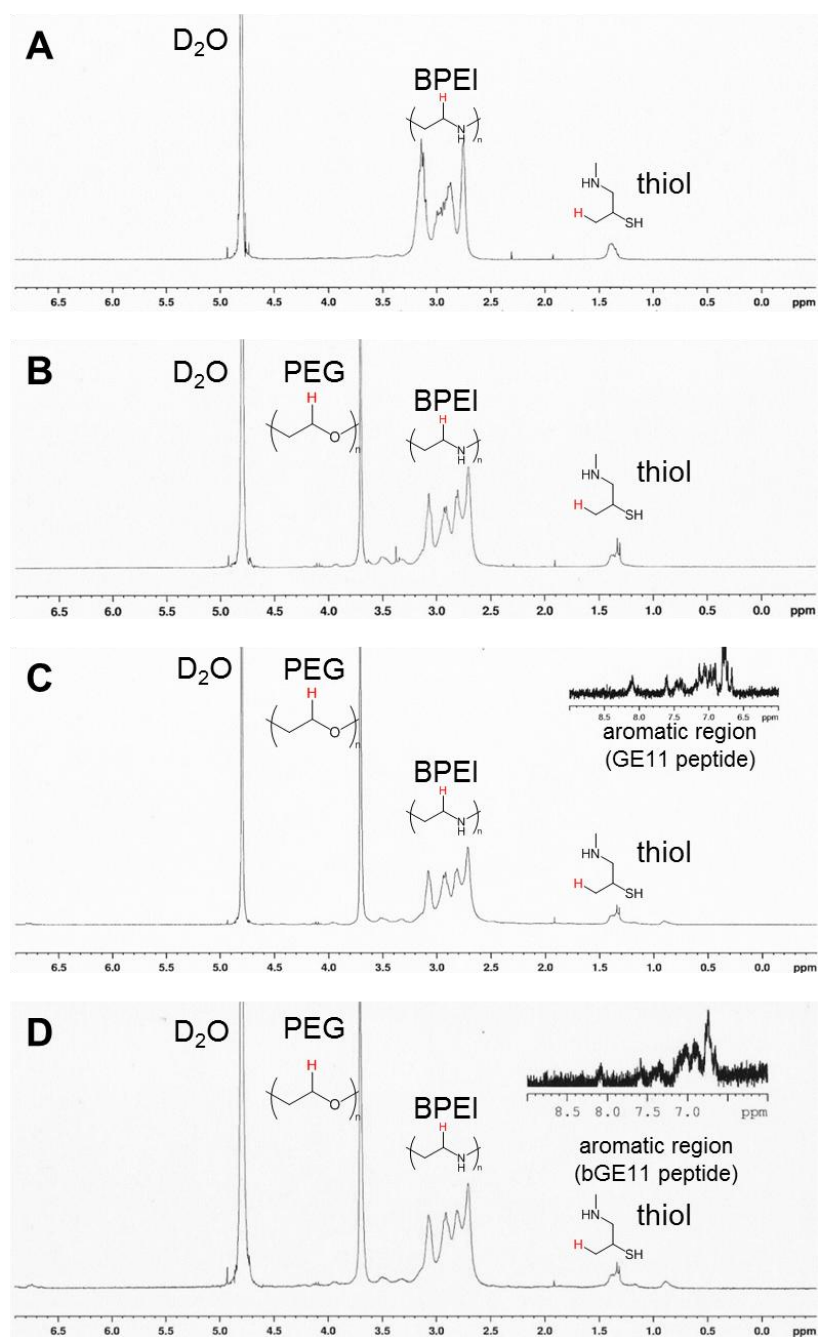

**Figure S2.**  $^1\text{H}$  NMR structure of (A) BPEI-SH, (B) BPEI-SS-PEG, (C) BPEI-SS-PEG-GE1, and (D) BPEI-SS-PEG-bGE11 in  $\text{D}_2\text{O}$ .

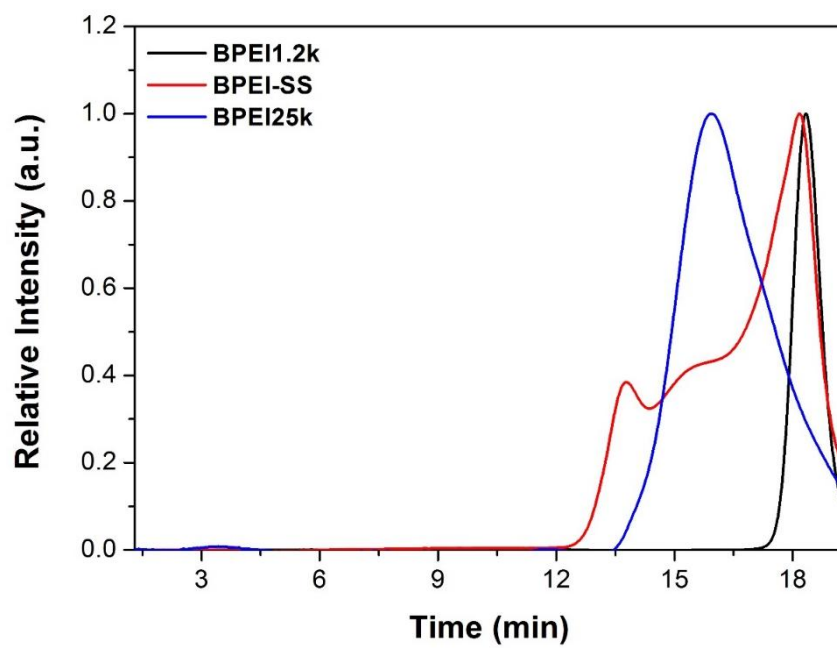

**Figure S3.** GPC spectra for BPEI-SS. BPEI25k and BPEI1.2k were used as controls.

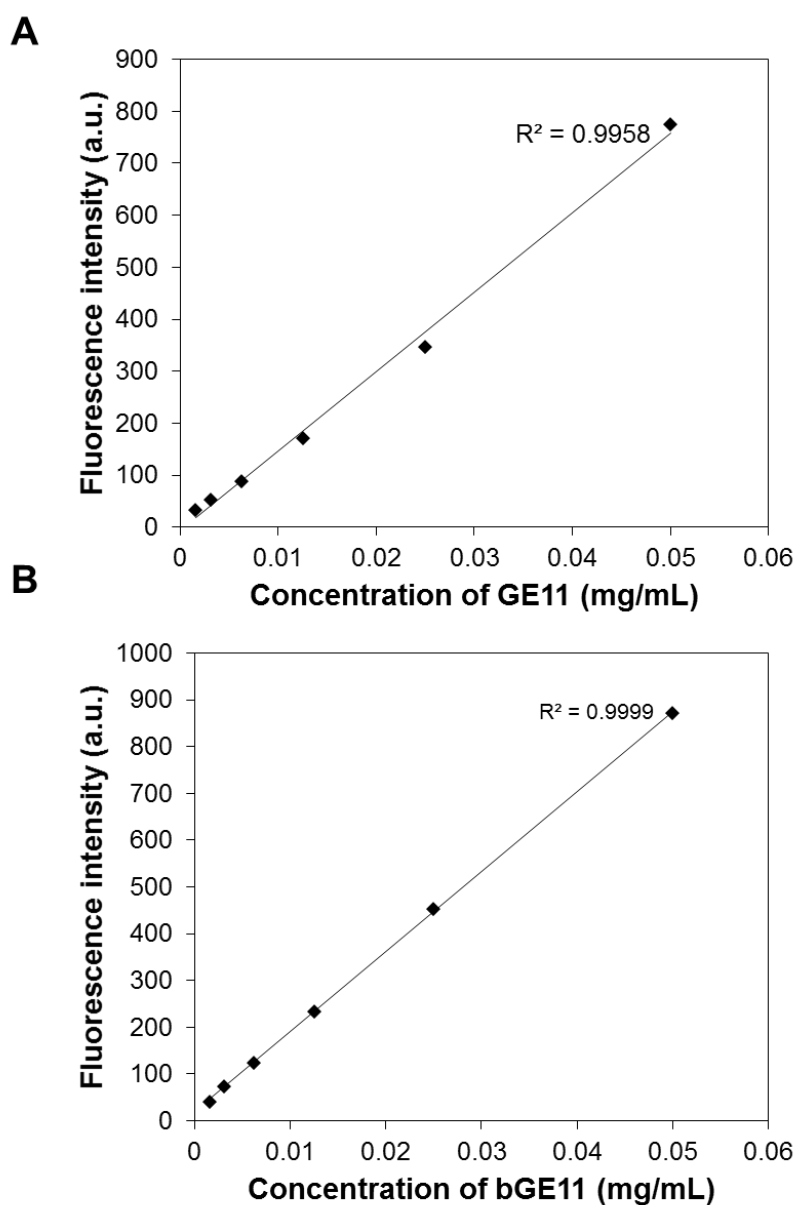

**Figure S4.** Calibration curve of (A) GE11 and (B) bGE11 peptides. GE11 and bGE11 have many aromatic amino acids in their sequences. Aromatic amino acids can emit intrinsic fluorescence.<sup>1</sup> The fluorescence was measured in DW.

## Reference

1. F. W. J. Teale and G. Weber, *Biochem. J.*, 1957, **65**, 476.
